1 For Journal of Pest Science, Springer

# 2 **Using synthetic semiochemicals to train** 3 **canines to detect bark beetle-infested trees**

4 Annette Johansson<sup>1,2</sup> Göran Birgersson<sup>1</sup>, and Fredrik Schlyter<sup>1,3\*</sup>

5 <sup>1</sup> Chemical Ecology, Department of Plant Protection Biology, PO Box 102, Swedish University  
6 of Agricultural Sciences, Alnarp, Sweden

7 <sup>2</sup> SnifferDogs Sweden, Bäckvägen 26, SE-342 93, Hjortsberga, Sweden

8 <sup>3</sup> Present address: Czech Univ Life Sci Prague, Fac Forestry & Wood Sci, EXTEMIT-K,  
9 Kamycka 129, Prague 16521 6, Czech Republic

10 \*) Correspondence: Fredrik Schlyter, [fredrik.schlyter@slu.se](mailto:fredrik.schlyter@slu.se)

11

12 Running title: Detection dogs used to detect bark beetle attacks

## 13 **Acknowledgements**

14 We thank Drs. M. Andersson and A. Bonaventura, and Prof O. Anderbrant, as well as Drs.  
15 Veronique Martel and Krista Ryall and Mr T. Gustafsson for valuable comments on earlier  
16 versions. Special thanks to go to Dr M. Feldlaufer (USDA, Beltsville) for extensive  
17 suggestions on content and language. The authors thank Anton Holmström at The Swedish  
18 Forest Agency, Växjö and the private foresters for granting us access to field trial and search  
19 areas in nature reserves and production forests. This research was funded by two grants from  
20 “The Södra Foundation for Research, Development and Education”, Växjö, Sweden to AJ. FS  
21 & GB was supported by the Linnaeus programme ‘Insect Chemical Ecology, Ethology and  
22 Evolution’ (IC-E<sup>3</sup>, #217-2006-1750) at SLU and later to FS (‘Rapid olfactory detection of  
23 insect and fungal damage in forests’, #2013-1583) both from “The Swedish Research Council  
24 Formas”. FS was further supported by EXTEMIT-K project financed by OP RDE at Czech  
25 University of Life Sciences Prague (CZ.02.1.01/0.0/0.0/15-003/0000433). Funding sources  
26 had no involvement in study design, data collection/interpretation or writing/submission of  
27 this report.

## 28 **Key Message**

- 29 • Detection dogs were rapidly trained to locate release of synthetic bark  
30 beetle pheromone components
- 31 • Synthetics allowed dog training off-season both in laboratory and field
- 32 • Dogs trained on synthetics detected naturally target pest insect attacked  
33 trees at a distance of more than 100 m.
- 34 • The method allows rapid removal of single, first attacked trees before  
35 offspring emergence, thus curbing local pest increase and lowering spread  
36 of attacks in the landscape

## 37 **Abstract**

38 In this proof of concept study, we report the off season training of two detection dogs on a  
39 series of synthetic semiochemicals associated with *Ips typographus* pest bark beetle  
40 infestations of spruce trees. Scent detection training allowed dogs to discriminate between  
41 physiologically-relevant infestation (target) odours, quantified by GC-MS using extracted ion  
42 chromatogram to be bio-active at levels of  $<10^{-4}$  ng /15 min or lower, and natural non-target  
43 odours that might be encountered in the forest. Detection dogs trained to recognize four  
44 different synthetic pheromone compounds in the winter time, well before beetle flight, were  
45 able to detect natural infested spruce trees unknown to humans the following summer. The  
46 trained detection dogs were able to detect an infested spruce tree from the first hour of bark  
47 beetle attack until several weeks after the attack. Trained detection dogs appear to be more  
48 efficient than humans in detecting early bark beetle infestations because the canines ability to  
49 cover a greater area and by olfaction detect infestations from a far greater distance than can  
50 humans. Infested spruce trees could be detected by trained detection dogs out to more than  
51 100 m.

52 **Key words:** *Ips typographus*, semiochemicals, GC-MS, detection dog, forest protection,  
53 Norway spruce

## 54 **Introduction**

55 Detection dogs are used to locate many objects including humans, explosives, and illicit drugs  
56 (see BROWNE et al. 2006 and references therein; LORENZO et al. 2003). Trained canines have  
57 also been used to detect invasive organisms (GOODWIN et al. 2010; HOYER-TOMICZEK et al.  
58 2016) as well as endangered species (reviewed by BEEBE et al. 2016). Canines have also been  
59 trained to detect small or cryptic insects such as termites (BROOKS et al. 2003), palm weevils  
60 (NAKASH et al. 2000), and bed bugs (PFIESTER et al. 2008; VAIDYANATHAN AND FELDLAUFER  
61 2013) and endangered Coleoptera (MOSCONI et al. 2017). The key benefits of using trained  
62 detection dogs are their keen sense of smell (HEPPER AND WELLS 2015), and their ability to  
63 cover large areas in a shorter time, when compared to humans (MOSCONI et al. 2017). In most  
64 cases, biological material is used for the training (JOHNEN et al. 2013).

65 The European spruce bark beetle – *Ips typographus* (L.) is one of the most destructive forest  
66 pests in Europe (GRÉGOIRE AND EVANS 2004). For forest protection, the rapid detection of  
67 bark beetle infestations is required to successfully implement a management strategy that  
68 relies upon removing recently infested trees within 2 –3 weeks of attack (SVENSSON 2007).  
69 However, human detection generally requires close inspection ( $\leq 1\text{m}$ ) of trees, and is  
70 therefore time-consuming, costly, and not always practical. Therefore, detection generally  
71 occurs 2–3 months after an infestation in N Europe, when tree crown colour fades and bark  
72 falls off. By this time, most bark beetles have left the infested tree and may attack other, non-  
73 infested stands. Since a rapidly changing, but specific series of beetle pheromone components  
74 and other semiochemicals are present for several weeks after an initial attack, the use of  
75 detection dogs may prove a better alternative than human inspection. Upon attacking a tree,  
76 male bark beetles secrete an aggregation pheromone, consisting of a blend of 2-methyl-3-  
77 buten-2-ol and *cis*-verbenol (BIRGERSSON et al. 1984). A few days later, an inhibitory signal  
78 (consisting mainly of ipsdienol) is emitted when bark beetle females have begun laying eggs

79 (BIRGERSSON et al. 1984; SCHLYTER et al. 1987). After the first week, an additional chemical  
80 cue, indicating that the infested tree is fully utilized and competition is high, is evident. This  
81 semiochemical, verbenone, is an oxygenation product by the beetle and by the interaction of  
82 fungi and bacteria with damaged tree phloem (LEUFVÉN AND BIRGERSSON 1987; SCHLYTER et  
83 al. 1989).

84 In this proof of concept study, we report the laboratory training of two detection dogs on a  
85 series of synthetic semiochemicals associated with bark beetle infestations, and the ability of  
86 these trained dogs to later detect and locate bark beetle infested trees in the field. Since the  
87 semiochemical profile of attacked trees changes rapidly in both the quality and quantity of  
88 semiochemicals released, we chose to use several synthetic chemical compounds as  
89 representative stimuli in our canine training. We were also interested in determining if dogs  
90 trained on synthetic pheromones in the winter months could later locate infested trees in the  
91 summer months. Finally, we wanted to determine if a trained dog can detect natural  
92 infestations from distances (10 to 100 times) further away than a human.

## 93 **Materials and methods**

### 94 ***Canines***

95 Two dogs, owned by SnifferDogs Sweden (Hjortsberga, Sweden), were used in this study. Dog  
96 A was a nine-year-old female German shepherd that was previously trained as a search and  
97 rescue dog for humans. Dog B was a one-year-old female Belgian shepherd (Malinois) that had  
98 only basic obedience training, and had no previous formal detection expertise.

### 99 ***Chemicals***

100 Synthetic bark beetle pheromones used in this study included methylbutenol (2-methyl-3-  
101 buten-2-ol; Acros Organics, Gothenburg, Sweden), 4*S*-*cis*-verbenol (Borregard, Sarpsborg,  
102 Norway), and (*S*)-ipsdienol (Bedoukian, Danbury Connecticut, USA). Synthetic verbenone, a

103 bark beetle pheromone and a product of the host tree was obtained from Fluka (Sigma-  
104 Aldrich, Stockholm, Sweden). Other chemicals used in the study were obtained from our  
105 chemical stocks (see ANDERSSON et al. 2012).

106 Each pheromone component was stored separately in separate jars of glass, to avoid cross  
107 contamination of odours. In each jar of glass a cotton pad (ICA Basic Bomullsrondeller,  
108 Netherlands) was placed in the bottom and a small amount of each semiochemical were  
109 dropped on to the cotton pad (10  $\mu$ l methylbutenol,  $\approx$ 10 mg *cis*-verbenol, 1  $\mu$ l ipsdienol, or 10  
110  $\mu$ l verbenone). The glass jars were then filled with cotton pads, and so molecules in gas phase  
111 of each component passed passively by aeration transfer in the closed jar, via adsorption of  
112 the odour to the pads placed above (HUDSON-HOLNESS AND FURTON 2010). The glass jars  
113 were stored in a freezer ( $\approx -18$  °C).

114 For determination of release rates by GC-MS and dog training response (Fig 1, Table 1) we  
115 always used the cotton pads from the top in each glass jar. The last five cotton pads in the  
116 glass jars we never used but filled up with new pads when needed. A cotton pad holding the  
117 semiochemical (HUDSON-HOLNESS AND FURTON 2010) was placed in a stainless steel tin (5  
118 cm dia.) with perforated lids (“Ströare”, Biltema®, Helsingborg, Sweden). For ordinary dog  
119 training, we replaced the cotton pads each day. For release rates by GC-MS and dog training  
120 response study we prepared 5 steel tins of each synthetic pheromone at the same time. These  
121 tins were stored in room temperature (circa + 20 °C). Release rates were determined using  
122 odour collections similar to Zhang et al. (2000). An inverted glass funnel (5 cm dia.) was  
123 placed above the steel tin and air was drawn through a column packed with Porapak® Q  
124 (25 mg mesh 60-80; in a Teflon tube 3 mm i.d.) at 100ml/min at 15 min intervals. Compounds  
125 were eluted from the column with 400  $\mu$ l pentane (Sigma-Aldrich, Steinheim, Germany) into  
126 a 400  $\mu$ l insert placed in a 2 ml screw top vial (Agilent Technologies, Böblingen, Germany),  
127 and 1 mg heptyl acetate was added as internal standard. Aeration extracts were analysed by  
128 gas chromatography- mass spectrometry (GC-MS; Agilent 6890-5975, Agilent Technologies,

129 Santa Clara, CA, USA) with techniques previously reported (BIRGERSSON et al. 1984).  
130 Quantifications were based on extracted ion chromatograms of prominent fragments for each  
131 tested compound and the internal quantification standard, respectively. The limit of  
132 quantification (LOQ) in the analytical procedure was < 0.1 ng/min.

### 133 **Laboratory tests**

134 Initially, dog A was introduced to the bark beetle pheromones using the synthetic odour from  
135 a commercial dispenser, ETOPheron® (Pheronova AG, Switzerland), which is used in bark  
136 beetle monitoring traps. Because of the dispensers construction of fabric with a plastic shell it  
137 was not 100% sure that the dog learned the scent of the pheromone components as the target  
138 odour or if it learned any other odour of the dispenser materials. It is easy to inadvertently  
139 train a dog to detect an unexpected or impure source when attempting to train to a pure  
140 compound. To be sure that the dog learned the right odours we subsequently trained the dog  
141 on pure synthetic semiochemicals applied to cotton pads. Non-target odours, that could  
142 disturb search, were also used in the training and consisted of items found in a forest setting  
143 such as vegetation odours from spruce needles, cones, resin, bark, moss, and animal odours  
144 (i.e. scent from feathers, fur, hoofs and faeces). All non-target (disturbance) odours were  
145 collected in the forest, or donated by local hunters (fur and hoofs from moose, deer, and boar).  
146 Both target and non-target odours were stored in jars of glass and transferred by aeration to  
147 cotton pads to ensure that the background odour of cotton was present in both target and  
148 disturbance odours.

149 The training platform used here (2D illustrations in Figure ESM\_1 and video in ESM\_4\_V1),  
150 was developed by Stig Meier Berg and Geir Kojedal, Spesialsøk, Selbu, Norway, based on an  
151 idea from Hundcampus, Hällefors, Sweden (FISCHER-TENHAGEN et al. 2011). It is designed to  
152 let the dog work independently, to minimize the cues from the handler and to be easily  
153 manoeuvred by the handler creating a more effective learning situation with a high rate of

154 opportunities to reward the dog for desired behaviour. Disturbance odours were presented  
155 together with one or several semiochemical stimuli in a movable tray with 7 positions (Figure  
156 in ESM\_2).

157 For evaluation of the dog detection performance with decreasing amounts of odour molecules  
158 over time nine trials were conducted to evaluate the dogs' identification performance with  
159 each synthetic semiochemical. For this trials we used 4 of the prepared 5 steel tins containing  
160 cotton pads with synthetic semiochemical. Since the trials were conducted over several days  
161 (1 hour through 84 hours after the cotton pads being placed in the tins and stored in room  
162 temperature) we used a new tin every day. This was done to make sure that the tins weren't  
163 contaminated with any other scents such as odour from the dogs. Every trial session lasted for  
164 approximately one minute (50-70 seconds).

165 To compare different stimuli linear layouts, mixing target and non-target scent, on the movable  
166 tray, the two dogs were tested in three trials with each stimuli layout (ESM\_2).

### 167 ***Outdoor tests***

168 To train the dogs to pinpoint the target odour source outdoors, pieces of the cotton pads  
169 containing synthetic pheromone odours as those used for platform training were hidden in  
170 cracks of the bark of several species of trees. The cotton pieces were placed in the height of  
171 the nose of the dogs and the dogs were shown where to sniff for the target (video  
172 ESM\_4\_V2). When the dog found the cotton piece holding the target odour, it was  
173 immediately rewarded by the sound of the clicker and a piece of food delivered between its  
174 nose and the odour source. Several pieces of cotton with either target or non-target odours,  
175 were put in cracks of the bark in a small area (30x30 cm) to ensure the dogs did not use visual  
176 cues for close-range target location. When the dogs were able to consistently (~ 100%) locate  
177 the pads, the dogs were gradually sent from longer distances to locate the tree with the cotton



178 pad, allowing the dog to detect decreasing amounts of target molecules and to follow the  
179 odour to its source.

180 Dogs were trained in the winter under a variety of weather conditions (*e.g.* rain, snow, sun).

181 Training trials using synthetic odour were conducted on average once a week during 2009 and  
182 2010. The temperature ranged from 2 to 28 °C. The handler determined the search strategy to  
183 best cover the assigned area based on wind conditions and terrain. These protocols were  
184 employed to simulate future practical field survey conditions.

185 A proof-of-concept test, evaluating the detection by dogs of spruces that were known to be  
186 recently attacked by bark beetles, was conducted at the Nature Reserve of Nötteryd (near  
187 Växjö, Småland, Sweden). The area consisted of wind-felled trees and standing healthy  
188 spruces. In the spring of 2009, 95% of all spruces in the reserve were already killed by bark  
189 beetles. The remaining spruces that were still alive stood together in clusters of 10-15 trees.  
190 We felt these circumstances made this particular Nature Reserve an optimal area to first try  
191 the dogs on natural attacks. Another series of tests were conducted at a production-forest in  
192 Nottebäck, also near Växjö, Småland, Sweden, with the permission of the owner of the forest.  
193 The dog team consisted of one dog (dog A) working off-leash and one handler, and searched  
194 three different areas in the production-forest attacked by bark beetles in previous years. The  
195 handler had knowledge of the location of former attacks, but no information if there were any  
196 new attacks. The dog and handler searched each area with no time-limit. The handler  
197 determined their search strategy to best cover the assigned area based on wind and terrain.  
198 These protocols were employed to simulate expected future practical field survey conditions.  
199 Dog and handler movements were recorded using global positioning systems (GPS) in 5-  
200 second intervals in all field trials. These data allowed identification of the point at which the  
201 dogs lifted their nose up in the air and made a sudden change in direction of travel and moved  
202 directly towards an infested spruce (video of search ESM\_4\_V3). The GPS units used in the

203 study were Garmin Astro® 220 Nordic handset and Garmin DC30 dog collar (Garmin  
204 Corporation, Taiwan). The map used in the handset was Garmin “Friluftskartan Pro V2  
205 Götaland”. The data from the GPS-unit were transferred to a PC with Garmin’s software  
206 MapSource. Using the measuring tool we could measure the distance from where a track from  
207 the dog changed direction to the waypoint where the dog alerted on an infested spruce.

## 208 **Field trial - detection distance from natural sources**

209 We used 20 different areas, whereof 10 were located in nature reserves and 10 in production  
210 forests, with permission of the owners and from The Swedish Forest Agency in Växjö in  
211 2010. All areas were 2 – 4 ha and tests were done in three different set-ups; a) 10 search areas  
212 with location of infestations known by handler b) 5 areas with location of infestations known  
213 by the forest manger, and c) 5 areas with location of infestations unknown, but were  
214 considered as risk areas with bark beetles infestations previous seasons.

215 To design the best search strategy for long distance detection, based on wind, terrain and the  
216 location of the attacks, the dog handler had prior knowledge of attacks in the 10 first areas. To  
217 estimate if the dog handler might involuntarily cue the dog to an odour source (an infested tree),  
218 the dog handler was not allowed prior knowledge of attacks in the 10 latter areas.

## 219 **Results**

### 220 ***Laboratory tests***

221 The two dogs were successfully trained to recognize the four different synthetic  
222 semiochemical compounds on the educational scent platform. Both dogs learned to recognize  
223 a new target scent in just one training trial, similar to Johnston (1999). In that time, the dogs  
224 managed to sample the tins for target odour about 30 times on average (video ESM\_4\_V1).  
225 Occasionally, the dogs reacted with an increased interest when a new non-target disturbance  
226 odour was presented. When this happened, the handler stood silent and just waited until the

227 dog stopped investigating the new non-target odour and, if the dog did not continue to search  
228 by itself, gave the dog a new command to start sampling the other tins again. After a few  
229 encounters with the new non-target odour the dogs' interest decreased since they learned that  
230 there would not be any reward for that particular odour. Even though the dogs appeared to  
231 alert on new, disturbance odours (mostly edible items like cookies and chips or scents from  
232 other animals) the handler did not record such behaviour as an alert. When alerting on a target  
233 odour, both dogs stopped sampling, and waited for their reward, in contrast to increased  
234 sampling a tin in order to investigate a disturbance odour.

### 235 ***Chemical stimuli strength***

236 Chemical quantification by odour collection and GC-MS was routine with a limit of  
237 quantification (LOQ) of < 0.1 ng/min. However, two days later, we found that most stimuli  
238 titres, still well biologically active, decreased to below the LOQ. Using estimates based upon  
239 linear regression, chemical data indicates that by the third day some compounds were very  
240 close to zero (Table 1).

241 The dogs responded to estimated doses of  $10^{-4}$  ng/15min releases or less. The four different  
242 semiochemicals were learned equally well, and responses to sub-picogram release rates of  
243 stimuli aged up to 3.5 days remained stable (Table in ESM\_3).

### 244 ***Biological responses***

245 The responses of both dogs to target odours are summarized per target scent in Table 2. The  
246 dogs achieved a mean of 99% correct indications; 1% of the incorrect indications were either  
247 false positive (alerting to a non-target odour; dog A) or false negatives in the beginning of a  
248 trial session (dog B) (Table 2). None of the dogs sampled all tins in every repetition. In each  
249 repetition four tins were presented, but the trainer could never know where the dog would  
250 start searching or in which direction it would continue its search. The only dispenser tin

251 always sampled was the tin holding the target scent. This explains the high success rate of  
252 99% for correct positives for the target scent (at which tin the search will stop), but the much  
253 lower rate, 55% for the correct negatives with direct sampling of empty tins before finding the  
254 target scent.

255 To increase the dogs sampling of all presented tins, we tried the dogs in different kinds of  
256 stimuli layouts with zero to three different target odours presented in the same trial, Figure A  
257 in ESM\_2. The only clear effect was for the layout with no target scent, where response  
258 decreased with time, Figure B in ESM\_2

259 Interestingly, over the >3 days of testing combined with chemical sampling, the correct  
260 responses remained consistently high irrespective of substance (Table 2). The positive  
261 responses showed no decline with estimated chemical stimuli levels (Fig 1A), indicating that  
262 stimuli levels were above animal detection limit for the period. The correct negative responses  
263 (no alert to disturbance odours) declined with the estimated stimuli strength since the dogs  
264 learned that these odours weren't going to be rewarded (Fig 1B).

## 265 ***Outdoor tests***

266 During off-season training, dogs were introduced to cotton pads initially placed at nose height  
267 in the cracks of the bark in different kind of trees (Video ESM\_4\_V2). Dog A, previously  
268 trained as a search and rescue dog, just needed to come into contact with one of the new learned  
269 target odours to expect a reward hence follow it to the source and pinpoint it to its handler. Dog  
270 A also alerted the found target source by barking. Probably because this was the trained alert  
271 when locating a hidden human as a search and rescue dog. Dog B, however, which had no  
272 previous search training, had to learn how to follow the odour plume to the source. Dog B was  
273 not trained to perform any other alert than pinpointing the source of the target odour. This dog  
274 did not know any other way to receive its reward but putting its nose on the target source. The  
275 target source became a button to push to get its reward.

276 Bark beetle activity usually began at the end of April, when the temperature increased to over  
277 20 °C, allowing us to test the dogs' ability to detect natural pheromone from attacking spruce  
278 bark beetles. Dog A successfully found the first spruce that was under attack, on the first day.  
279 The spruce in question showed no signs of the attack at first sight, but further inspection at  
280 close range revealed that the first bark beetles were drilling their way in to the spruce bark and  
281 the sound of their drilling could also be heard. This finding was crucial in demonstrating that  
282 it is possible to train a dog on a synthetic odour and subsequently showing that it will alert to  
283 the natural odour under field conditions. All training and detection beetle in the Nature  
284 Reserve was terminated at the end of May when so many spruces were under bark beetle  
285 attack that the smell from the attacked trees became obvious even for the human nose.

286 Both dogs were also successful in locating sparser attacks in production forest stands, where  
287 attacks were neither known to the dog handler nor the forest manager. In the first area  
288 searched, dog A detected and alerted to a single, wind-felled spruce that had been infested by  
289 bark beetles. In the second area searched, the same dog found seven infested standing spruces.  
290 Five of them stood together in a cluster among old attacks. Two were located in a felling  
291 edge.

292 In the third area, the dog detected five infested spruces, both standing and wind-felled. In this  
293 area all the spruces were located near a felling edge by a clear-felled area where felled trap-  
294 trees were placed. The dog started its search with detecting and alerting on the synthetic  
295 pheromones from the trap-trees. When sent to continue its search the dog detected,  
296 recognized, followed, and alerted on the natural pheromones emitted from the bark beetles in  
297 standing trees (as shown in video ESM\_4\_V4).

298 The handler observed by GPS a majority of successfully located sources of natural pheromone  
299 to be detected within 50 m, but both dogs located sources in a behavioural sequence over a  
300 range of 50 – 100 m (Fig 2A). No differences in detection distance by GPS could be seen

301 among areas with attacks (10) known or unknown (10) to the handler. Later analysis of the  
302 GPS-tracks showed several occasions where the more experienced dog A changed direction  
303 and was able to detect the pheromones from bark beetle attacked trees at a distance of over  
304 100 m from the source and follow it to the source (Fig 2B). In the 20 areas visited, the dogs  
305 found in total 193 trees infested by bark beetles, in 77 different groups of attacked trees.

## 306 **Discussion**

307 Training canines to detect bark beetle-infested trees poses some important limitations,  
308 including the relatively short season available for using trees at various stages of attack, as  
309 well the risk of inducing a full-blown tree attack by placing pheromone for training purpose  
310 on a host tree during the actual beetle flight period. While it is probably possible to train a  
311 detection dog to locate spruces that have been attacked by bark beetles by just letting the dog  
312 sniff an attacked spruce and reward the dog, such a “natural” method will not teach a dog to  
313 recognize the different kinds of semiochemicals the bark beetle releases over the course of an  
314 attack. Therefore, we chose to train the dogs to recognize a series of synthetic pheromone  
315 compounds and using an indoor training platform. In this study, we demonstrate that canines  
316 trained on synthetic bark beetle pheromone compounds at low (sub-picogram) levels, indoors,  
317 can later recognize naturally-produced pheromone over long distances, outdoors.

318 Additionally, by using synthetic sources of the bark beetle pheromone in the laboratory, it is  
319 possible to train dogs off-season long before the bark beetles start their flight period in the  
320 field, and the dog handler has control over which odours the dog learns, one at a time and at  
321 very low concentrations. The indoor training of canines also has the benefit in that other  
322 environmental distractions are minimized, thereby allowing the dogs to concentrate on and  
323 learn the target odours.

324 In the field, detection dogs that work over large areas (“off-leash”) can often be seen lifting  
325 their nose up in the air and then make a sudden change in direction of travel. This likely

326 occurs when the dog enters an area with a detectable odour (a plume) that the dog identifies as  
327 its trained target odour. While the odour plume structure in a field setting, where the plume  
328 shape, size, and persistence is highly dynamic, cannot be easily delineated by chemical means  
329 due to the very low titres present in open air (MURLIS et al. 2000; RIFFELL et al. 2008), it can,  
330 at least, be observed through olfactory-behavioural responses of dogs to target odour plumes.  
331 In our study, a trained detection dog could detect an infested spruce tree from a distance of  
332 150 m, which is farther away than that estimated for bark beetles (*Ips typographus*)  
333 responding to beetle pheromone dispensers (SCHLYTER 1992).

334 In training dogs to detect bed bugs (*Cimex lectularius* L.), the dog usually searches (either  
335 “on-leash” or “off-leash”) the entire room – often several times – before alerting on a bed bug.  
336 In this case, the dog-handler interaction is paramount owing to the vastly different scales of  
337 indoor room searches (1 – 10 m) compared to free-ranging forest searches (10 – 500 m).  
338 Issues surrounding a close interaction between dog and handler have been reported (LIT et al.  
339 2011), though during our large scale, forest searches these issues would be minimal, at best.  
340 In a study of canines involved in bed bug detection, a high degree of false positives and low  
341 true positives were found (COOPER et al. 2014).

342 Little, if any, studies can be found using pure, known synthetic samples for canine detection  
343 purposes (JOHNEN et al. 2013). However, it is clear that canines can show a dose-response to  
344 relatively low (but quantitatively unknown) doses (KRESTEL et al. 1984; POLGÁR et al. 2016;  
345 WALKER et al. 2006). Our levels of correct positives (sensitivity) and correct negatives  
346 (specificity) appear high, compared to the seven studies recently reviewed that provided such  
347 data (JOHNEN et al. 2013). Hitherto, no quantitative data exist on chemical strength during dog  
348 training in the open literature in spite of some early attempts (KRESTEL et al. 1984; WALKER  
349 et al. 2006). No doubt, the dearth of chemical data is due to low thresholds for dog response  
350 to volatiles. While our data are novel, we must admit that our empirical data spans only a part  
351 of the tested range of stimuli diminution over time, mainly the one-day-old dispenser

352 material, and we had to rely on estimates from linear regression for the older material with  
353 lower releases. Still, our estimates appear to be the best so far documented.

354 The “search-and-pick” method of detection and removal of bark beetle- infested trees within  
355 2–3 weeks of attack (SVENSSON 2007) often fails because of the short time frame involved.

356 Trees were often not cut and removed from the forest until weeks or months later  
357 (LÅNGSTRÖM AND BJÖRKLUND 2010), long after beetles had moved to attack other trees.

358 Finding spruces in an early stage of attack is also significant for the timber value, due to a  
359 blue stain fungi the beetle introduces into the newly-attacked trees (KIRISITS 2004).

360 Since the pheromone blends used by the bark beetles for intraspecific communication vary in  
361 strength and composition over time, we importantly observed that the dogs could detect all of  
362 the substances on which they were trained; therefore, it makes no difference which  
363 semiochemical composition the bark beetles in an infested tree is currently emitting. Thus, a  
364 trained dog will detect and follow any of the odours, alone or in blends, to the source and alert  
365 the dog handler. While it is possible that the dog may learn additional odours that may occur  
366 when a spruce is under attack (BIRGERSSON AND BERGSTRÖM 1989; SCHIEBE et al. 2012) any  
367 conclusions to this effect would be speculation on our part.

368 In our study, searches would often be conducted in colder and wetter periods, in-between the  
369 short warm-weather swarming periods of the beetle. It would be interesting and of practical  
370 relevance to know more precisely how different weather conditions may affect the dogs’  
371 ability to search a larger area.

372 In view of the large number of pheromones identified to date from moths, beetles and other  
373 pests (> 1 000) (EL-SAYED 2017), it would seem feasible to start training of detection dogs for  
374 many pest management systems.

375 In summary, this is the first report of using synthetic pheromone compounds at known titres  
376 to train detection dogs to detect and locate living animals in the field. Dogs could detect and



377 locate the source of pest insect infestations at a distance of over 100 m or more. The use of  
378 detection dogs for early detection of bark beetle infestations could contribute to better forest  
379 protection. We suggest that, in general, use of stimuli that are biochemically well-defined in  
380 both quality and quantity appears to hold promise for both better practise and science in  
381 detection dog training to biological objects, such as cryptic pests.

382 **Miscellaneous information**

383 **Funding:** See information in Acknowledgements.

384 **Conflict of interest:** The authors declare that they have no conflict of interests.

385 **Ethical approval:** Both dogs participating in this study were private owned working dogs  
386 and handled by their owners. According to Swedish legislation no part of this study included  
387 abuse to an animal at the time of study.

388 **Author contributions:** AJ and FS designed research; AJ and GB collected data; AJ, GB, and  
389 FS analyzed data; all authors contributed to the writing process. All authors read and  
390 approved the submitted version.

## 391 **References**

- 392 Andersson MN, Schlyter F, Hill SR, Dekker T, 2012. What reaches the antenna? How to  
393 calibrate odor flux and ligand-receptor affinities. *Chem. Senses*, 37, 403-420.
- 394 Beebe SC, Howell TJ, Bennett PC, 2016. Using scent detection dogs in conservation settings:  
395 A review of scientific literature regarding their selection. *Front. Vet. Sci.*, 3, 96.
- 396 Birgersson G, Bergström G, 1989. Volatiles released from individual spruce bark beetle  
397 entrance holes: Quantitative variations during the first week of attack. *J. Chem.*  
398 *Ecol.*, 15, 2465-2483.
- 399 Birgersson G, Schlyter F, Löfqvist J, Bergström G, 1984. Quantitative variation of pheromone  
400 components in the spruce bark beetle *ips typographus* from different attack  
401 phases. *J. Chem. Ecol.*, 10, 1029-1055.
- 402 Brooks SE, Oi FM, Koehler PG, 2003. Ability of canine termite detectors to locate live  
403 termites and discriminate them from non-termite material. *J. Econ. Entomol.*, 96,  
404 1259-1266.
- 405 Browne C, Stafford K, Fordham R, 2006. The use of scent-detection dogs. *Irish Veterinary*  
406 *Journal*, 59, 97-104.
- 407 Cooper R, Wang C, Singh N, 2014. Accuracy of trained canines for detecting bed bugs  
408 (hemiptera: Cimicidae). *J. Econ. Entomol.*, 107, 2171-2181.
- 409 El-Sayed A, 2017. The pherobase: Database of pheromones and semiochemicals. [WWW  
410 document]. URL <http://www.pherobase.com>>.
- 411 Fischer-Tenhagen C, Wetterholm L, Tenhagen BA, Heuwieser W, 2011. Training dogs on a  
412 scent platform for oestrus detection in cows. *Appl. Anim. Behav. Sci.*, 130, 63-70.
- 413 Goodwin KM, Engel RE, Weaver DK, 2010. Trained dogs outperform human surveyors in  
414 the detection of rare spotted knapweed (*centaurea stoebe*). *Inv. Plant. Sci.*  
415 *Manag.*, 3, 113-121.
- 416 Grégoire J-C, Evans HF, 2004. Damage and control of bawbilt organisms - an overview. In:  
417 Bark and wood boring insects in living trees in europe, a synthesis. Ed. by F  
418 Lieutier, KR Day, A Battisti, J-C Grégoire, HF Evans, Springer Netherlands, 19 -  
419 37.

- 420 Hepper P, Wells D, 2015. Olfaction in the order carnivora: Family canidae. In: Handbook of  
421 olfaction and gustation. Ed. by RL Doty, John Wiley & Sons, Inc, , Hoboken, NJ,  
422 USA., 591-604.
- 423 Hoyer-Tomiczek U, Sauseng G, Hoch G, 2016. Scent detection dogs for the asian longhorn  
424 beetle, *anoplophora glabripennis*. EPPO Bulletin, 46, 148-155.
- 425 Hudson-Holness D, Furton K, 2010. Comparison between human scent compounds collected  
426 on cotton and cotton blend materials for spme-gc/ms analysis. Journal of Forensic  
427 Research, 1, 101. doi: 110.4172/2157-7145.1000101.
- 428 Johnen D, Heuwieser W, Fischer-Tenhagen C, 2013. Canine scent detection – fact or fiction?  
429 Appl. Anim. Behav. Sci., 148, 201–208.
- 430 Johnston J, 1999. Canine detection capabilities: Operational implications of recent r & d  
431 findings [WWW document]. URL [http://www.barksar.org/K-](http://www.barksar.org/K-9_Detection_Capabilities.pdf)  
432 [9\\_Detection\\_Capabilities.pdf](http://www.barksar.org/K-9_Detection_Capabilities.pdf).
- 433 Kirisits T, 2004. Fungal associates of european bark beetles with special emphasis on the  
434 ophiostomatoid fungi. In: Bark and wood boring insects in living trees in europe,  
435 a synthesis. Ed. by F Lieutier, KR Day, A Battisti, J-C Grégoire, HF Evans,  
436 Springer Netherlands, 181-236.
- 437 Krestel D, Passe D, Smith J, Jonsson L, 1984. Behavioral determination of olfactory  
438 thresholds to amyl acetate in dogs. Neurosci. Biobehav. Rev., 8, 169-174.
- 439 Leufvén A, Birgersson G, 1987. Quantitative variation of different monoterpenes around  
440 galleries of *ips typographus* (coleoptera: Scolytidae) attacking norway spruce.  
441 Can. J. Bot., 65, 1038-1044.
- 442 Lit L, Schweitzer JB, Oberbauer AM, 2011. Handler beliefs affect scent detection dog  
443 outcomes. Anim Cogn, 14, 387-394.
- 444 Lorenzo N, Wan TL, Harper RJ, Hsu YL, Chow M, Rose S, Furton KG, 2003. Laboratory and  
445 field experiments used to identify *canis lupus* var. *Familiaris* active odor  
446 signature chemicals from drugs, explosives, and humans. Analyt. Bioanalyt.  
447 Chem., 376, 1212-1224.
- 448 Långström B, Björklund N, 2010. Progress in management of spruce bark beetle [in swedish:  
449 Så har bekämpningen av granbarkborren lyckats]. Skogseko, 8-9.

- 450 Mosconi F, Campanaro A, Carpaneto GM, Chiari S, Hardersen S, Mancini E, Maurizi E,  
451 Sabatelli S, Zauli A, Mason F, 2017. Training of a dog for the monitoring of  
452 *osmoderma eremita*. Nat. Conserv., 20, 237-264.
- 453 Murlis J, Willis MA, Cardé RT, 2000. Spatial and temporal structures of pheromone plumes  
454 in fields and forests. Physiol. Entomol., 25, 211-222.
- 455 Nakash J, Osem Y, Kehat M, 2000. A suggestion to use dogs for detecting red palm weevil  
456 (*rhynchophorus ferrugineus*) infestation in date palms in israel. Phytoparasitica,  
457 28, 153-155.
- 458 Pfister M, Koehler PG, Pereira RM, 2008. Ability of bed bug-detecting canines to locate live  
459 bed bugs and viable bed bug eggs. J. Econ. Entomol., 101, 1389-1396.
- 460 Polgár Z, Kinnunen M, Újváry D, Miklósi Á, Gácsi M, 2016. A test of canine olfactory  
461 capacity: Comparing various dog breeds and wolves in a natural detection task.  
462 PLoS ONE, 11, e0154087.
- 463 Riffell J, Abrell L, Hildebrand JG, 2008. Physical processes and real-time chemical  
464 measurement of the insect olfactory environment. J. Chem. Ecol., 34, 837-853.
- 465 Schiebe C, Hammerbacher A, Birgersson G, Witzell J, Brodelius P, Gershenzon J, Hansson  
466 BS, Krokene P, Schlyter F, 2012. Inducibility of chemical defences in norway  
467 spruce bark is correlated with unsuccessful mass attacks by the spruce bark beetle.  
468 Oecologia, 170, 183-198.
- 469 Schlyter F, 1992. Sampling range, attraction range, and effective attraction radius: Estimates  
470 of trap efficiency and communication distance in coleopteran pheromone and host  
471 attractant systems. J. Appl. Entomol., 114, 439-454.
- 472 Schlyter F, Birgersson G, Leufvén A, 1989. Inhibition of attraction to aggregation pheromone  
473 by verbenone and ipsenol: Density regulation mechanisms in bark beetle *ips*  
474 *typographus*. J. Chem. Ecol., 15, 2263-2278.
- 475 Schlyter F, Byers J, Löfqvist J, 1987. Attraction to pheromone sources of different quantity,  
476 quality, and spacing: Density-regulation mechanisms in bark beetle *ips*  
477 *typographus*. J. Chem. Ecol., 13, 1503-1523.
- 478 Svensson L, 2007: Övervakning av insektsangrepp - slutrapport från skogsstyrelsens  
479 regeringsuppdrag [in swedish: Monitoring of insect attacks - final report from  
480 sfa's government assingment]. Jönköping: Swedish Forest Agency.

- 481 Vaidyanathan R, Feldlaufer MF, 2013. Bed bug detection: Current technologies and future  
482 directions. *Am. J. Trop. Med. Hyg.*, 88, 619-625.
- 483 Walker DB, Walker JC, Cavnar PJ, Taylor JL, Pickel DH, Hall SB, Suarez JC, 2006.  
484 Naturalistic quantification of canine olfactory sensitivity. *Appl. Anim. Behav.*  
485 *Sci.*, 97, 241-254.
- 486 Zhang Q-H, Schlyter F, Birgersson G, 2000. Bark volatiles from nonhost angiosperm trees of  
487 spruce bark beetle, *Ips typographus* (L.) (Coleoptera: Scolytidae): Chemical and  
488 electrophysiological analysis. *Chemoecol.*, 10, 69-80.

## 489 **Figure captions**

### 490 **Fig 1. Correct responses in relation to estimated stimuli evaporation rates per 15 min.**

491 **a)** Correct positive responses to stimuli (compounds) with known total release  
492 over 3 days of testing. No effect of time for all stimuli joined ( $r^2 \approx 0$ ).  
493 **b)** Correct negative responses to stimuli with known total release over 3 days of  
494 testing. Weak effect of time for all stimuli joined ( $r^2 = 0.18$ ). Separately, MB  
495 shows the strongest effect ( $r^2 = 0.85$ ) together with Vn ( $r^2 = 0.48$ ). Chemical data  
496 from Table 1. The responses of the two dogs are pooled here, separate data in  
497 Table 2. Semiochemical acronyms: MB) Methylbutenol, cV) 4*S-cis*-Verbenol, Id)  
498 Ipsdienol, Vn) (-)-Verbenone.

### 499 **Fig 2. Field GPS tracks and detection distances.**

500 **a)** Tracks from an example of handler and search dog finding an unknown mass-  
501 attacked single tree. GPS-units tracks shown with Google Earth on a background  
502 satellite image over the area. Distance from Change of Direction to the attacked  
503 trees = 157 m. Maps, aerial photos/satellite images: Copyright/Lantmäteriet,  
504 Sweden, consent #: I2011/0096. (See GPS unit with tracks in video ESM\_4\_V3.)  
505 **b)** Detection distances recorded from GPS tracks when locating natural bark  
506 beetle mass-attacks unknown to handler.

507 **Supporting Information.**

508 **ESM\_1** Fig. Educational scent platform. (PDF)

509 **ESM\_2** Fig. Training platform stimuli layout and decline in response to no target scent.  
510 (PDF)

511 **ESM\_3** Table. Evaluation of the dog detection performance as number of indications with  
512 decreasing amounts of scent molecules over time. (PDF)

513 **ESM\_4\_V1** Video. Educational scent platform in operation. (AVI)

514 **ESM\_4\_V2** Video. Placement of cotton scent pad and the location of the scent by dog on a  
515 pine (a non-host tree of the beetle). (AVI)

516 **ESM\_4\_V3** Video. The search, GPS tracking, and location of natural attacks. (AVI)

517 **ESM\_4\_V4** Video. The search, location of two adjacent natural attacks, and rewarding. (AVI)

518 (The four videos can be accessed here as well: [V1 to V4 Suppl material.](#))



519 **Video stills**

**Video stills**

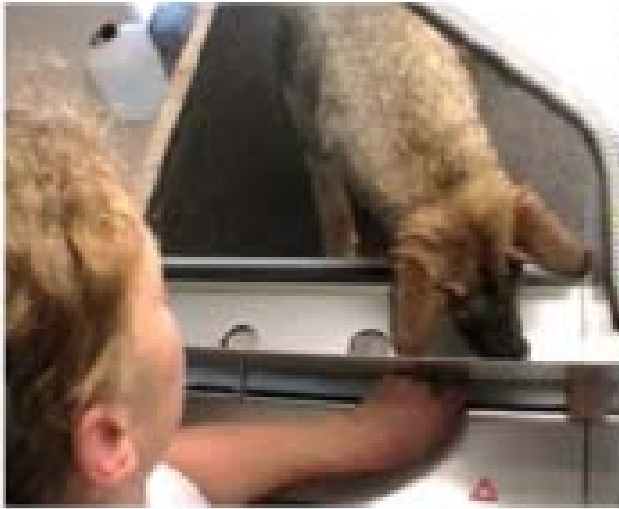

**V1**

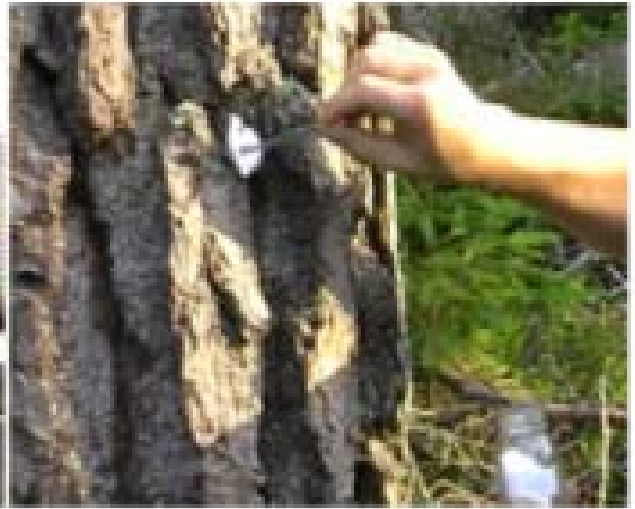

**V2**

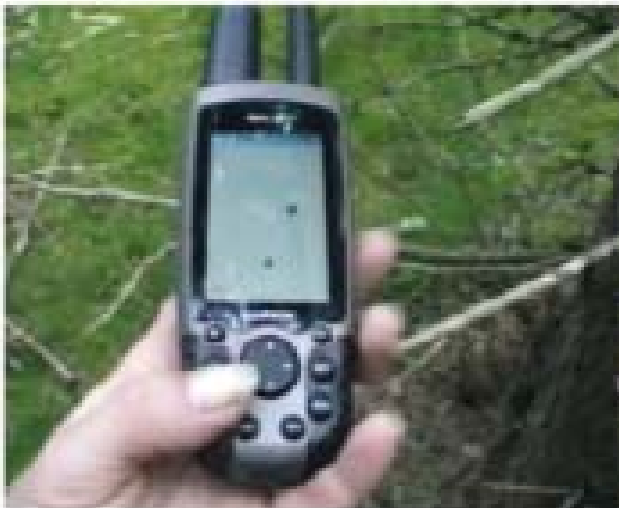

**V3**

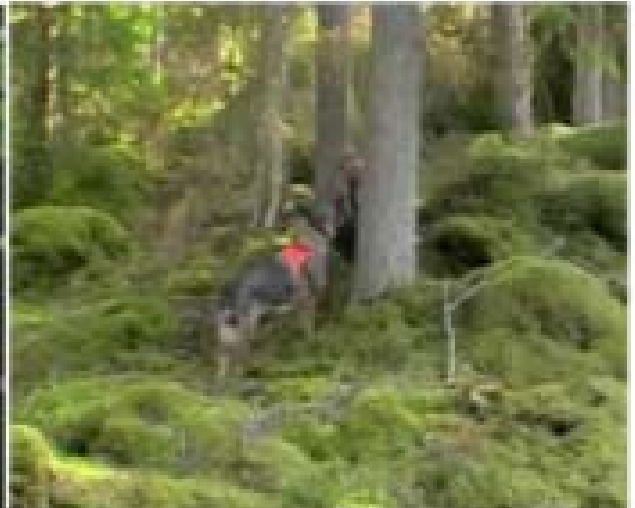

**V4**

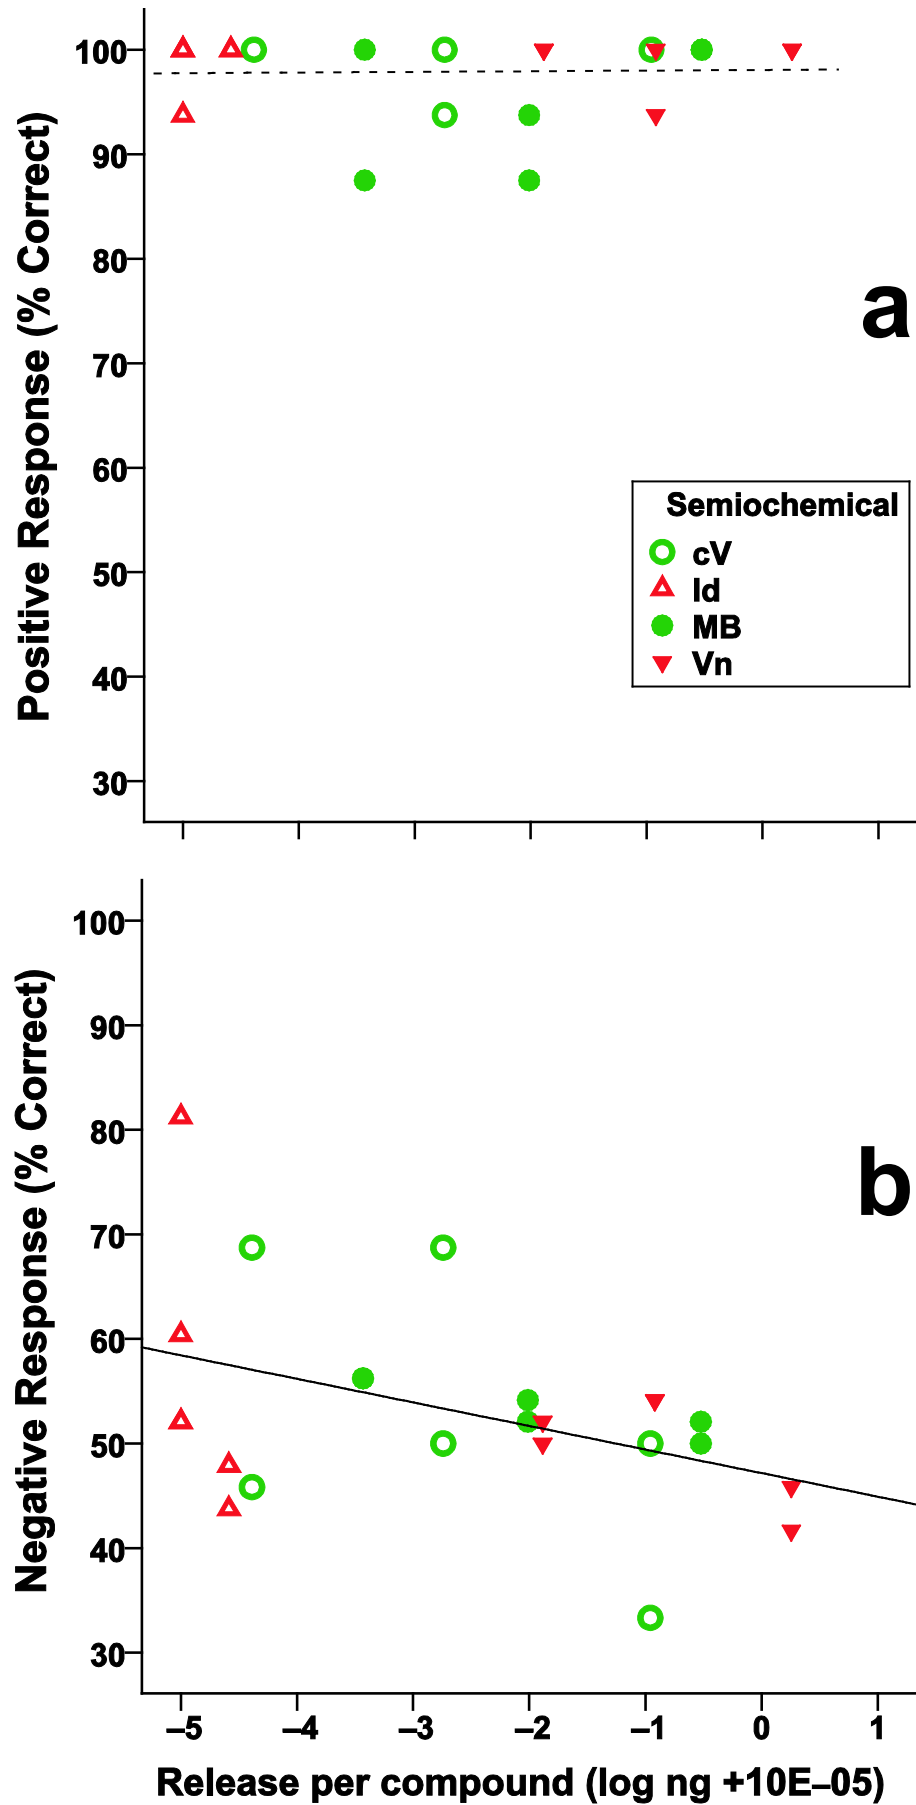

**Fig. 1**

**a**

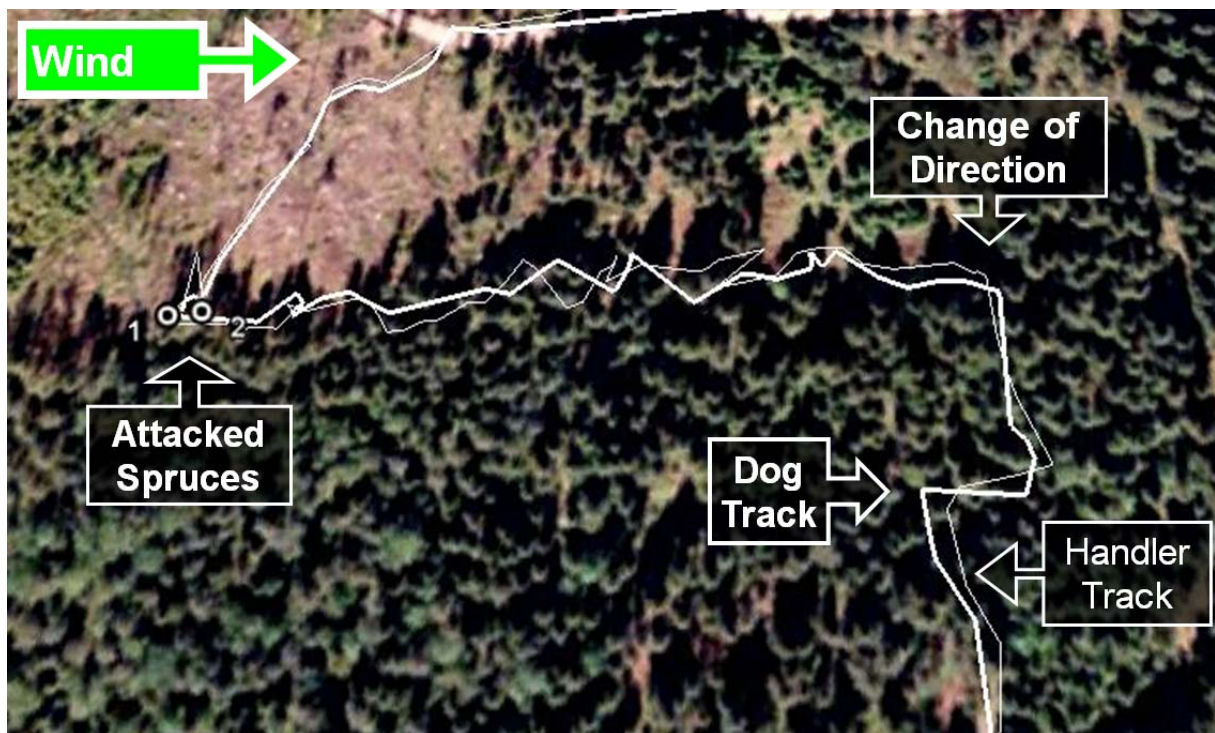

**b**

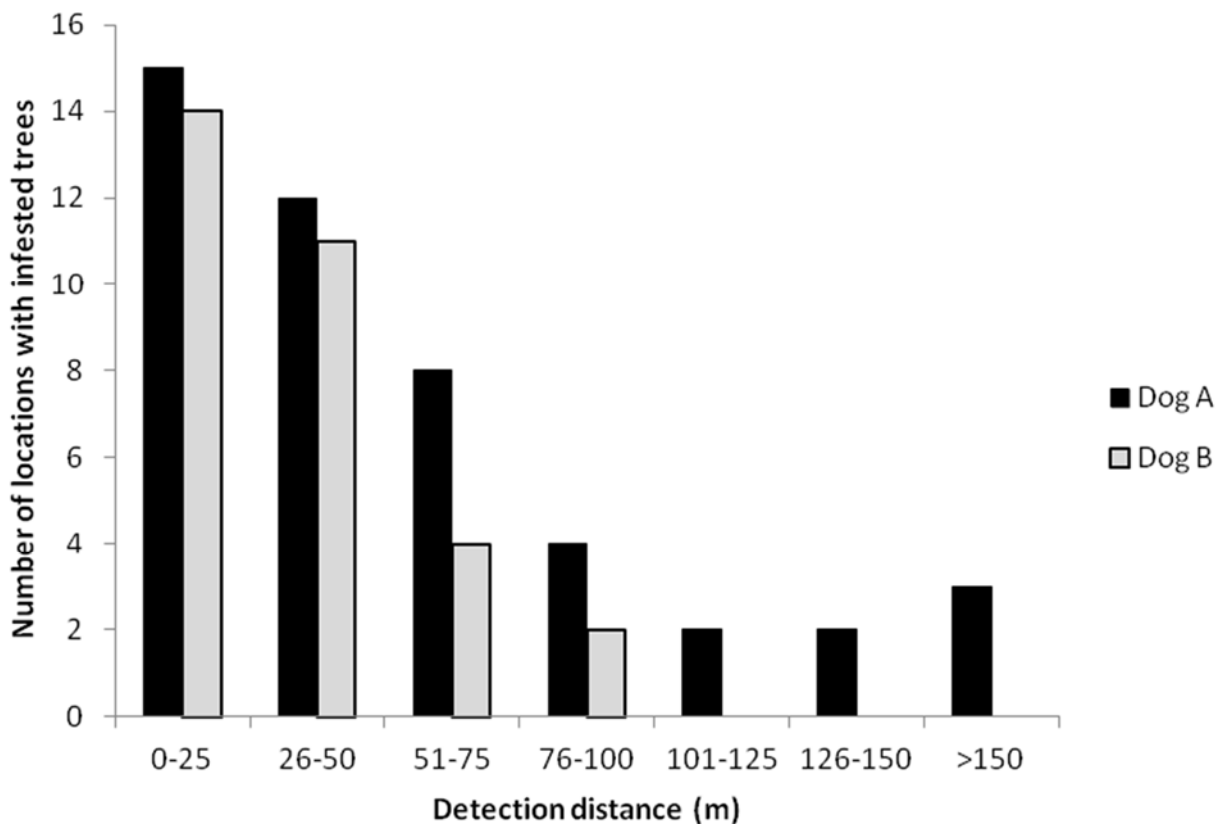

Fig. 2
